# Supplementary material for: Prognostic Impact of Sarcopenia in Patients with Metastatic Hormone-Sensitive Prostate Cancer
Source: MDPI journal article supplement (doi:10.3390/cancers13246345), 2021-12-17
Supplement: s1 [file s1]

**Table S2. Gene ontology using down-regulated genes in sarcopenia (cutoff: *P* value <0.05)**

| Category      | Term                                                             | Count | %       | <i>P</i> value | Genes                                                                                                                                                                   |
|---------------|------------------------------------------------------------------|-------|---------|----------------|-------------------------------------------------------------------------------------------------------------------------------------------------------------------------|
| GOTERM_BP_FAT | GO:0019752~carboxylic acid metabolic process                     | 18    | 13.8462 | <0.001         | CYP2J2, LYPLA1, XBP1, PLA2G4F, ELOVL5, DCXR, SORD, MIF, ACAT2, GSTZ1, ALDH1A3, PSAT1, EHHADH, PCCB, SMS, CRYL1, GNE, SNCA                                               |
| GOTERM_BP_FAT | GO:0043436~oxoacid metabolic process                             | 18    | 13.8462 | <0.001         | CYP2J2, LYPLA1, XBP1, PLA2G4F, ELOVL5, DCXR, SORD, MIF, ACAT2, GSTZ1, ALDH1A3, PSAT1, EHHADH, PCCB, SMS, CRYL1, GNE, SNCA                                               |
| GOTERM_BP_FAT | GO:0032787~monocarboxylic acid metabolic process                 | 14    | 10.7692 | <0.001         | CYP2J2, LYPLA1, XBP1, PLA2G4F, ELOVL5, DCXR, SORD, MIF, ACAT2, ALDH1A3, EHHADH, PCCB, CRYL1, SNCA                                                                       |
| GOTERM_BP_FAT | GO:0006082~organic acid metabolic process                        | 18    | 13.8462 | <0.001         | CYP2J2, LYPLA1, XBP1, PLA2G4F, ELOVL5, DCXR, SORD, MIF, ACAT2, GSTZ1, ALDH1A3, PSAT1, EHHADH, PCCB, SMS, CRYL1, GNE, SNCA                                               |
| GOTERM_BP_FAT | GO:0060337~type I interferon signaling pathway                   | 6     | 4.61538 | <0.001         | STAT1, OAS2, OAS3, IFI6, ISG15, IRF9                                                                                                                                    |
| GOTERM_BP_FAT | GO:0071357~cellular response to type I interferon                | 6     | 4.61538 | <0.001         | STAT1, OAS2, OAS3, IFI6, ISG15, IRF9                                                                                                                                    |
| GOTERM_BP_FAT | GO:0006631~fatty acid metabolic process                          | 11    | 8.46154 | <0.001         | CYP2J2, LYPLA1, XBP1, PLA2G4F, ELOVL5, EHHADH, PCCB, CRYL1, MIF, ACAT2, SNCA                                                                                            |
| GOTERM_BP_FAT | GO:0034340~response to type I interferon                         | 6     | 4.61538 | <0.001         | STAT1, OAS2, OAS3, IFI6, ISG15, IRF9                                                                                                                                    |
| GOTERM_BP_FAT | GO:0044283~small molecule biosynthetic process                   | 12    | 9.23077 | <0.001         | SEC14L2, ALDH1A3, XBP1, PLA2G4F, PSAT1, ELOVL5, RFK, PCCB, SORD, DHCR7, MIF, SNCA                                                                                       |
| GOTERM_BP_FAT | GO:0051167~xylulose 5-phosphate metabolic process                | 3     | 2.30769 | <0.001         | DCXR, SORD, CRYL1                                                                                                                                                       |
| GOTERM_BP_FAT | GO:1901159~xylulose 5-phosphate biosynthetic process             | 3     | 2.30769 | <0.001         | DCXR, SORD, CRYL1                                                                                                                                                       |
| GOTERM_BP_FAT | GO:0019640~glucuronate catabolic process to xylulose 5-phosphate | 3     | 2.30769 | <0.001         | DCXR, SORD, CRYL1                                                                                                                                                       |
| GOTERM_BP_FAT | GO:0006064~glucuronate catabolic process                         | 3     | 2.30769 | <0.001         | DCXR, SORD, CRYL1                                                                                                                                                       |
| GOTERM_BP_FAT | GO:0072329~monocarboxylic acid catabolic process                 | 6     | 4.61538 | 0.001          | EHHADH, DCXR, PCCB, SORD, CRYL1, ACAT2                                                                                                                                  |
| GOTERM_BP_FAT | GO:0036498~IRE1-mediated unfolded protein response               | 5     | 3.84615 | 0.001          | XBP1, SERP1, DNAJB9, WIP1, PDIA5                                                                                                                                        |
| GOTERM_BP_FAT | GO:0046395~carboxylic acid catabolic process                     | 7     | 5.38462 | 0.002          | GSTZ1, EHHADH, DCXR, PCCB, SORD, CRYL1, ACAT2                                                                                                                           |
| GOTERM_BP_FAT | GO:0030968~endoplasmic reticulum unfolded protein response       | 6     | 4.61538 | 0.002          | XBP1, SERP1, DNAJB9, WIP1, PDIA5, HSP90B1                                                                                                                               |
| GOTERM_BP_FAT | GO:0034620~cellular response to unfolded protein                 | 6     | 4.61538 | 0.002          | XBP1, SERP1, DNAJB9, WIP1, PDIA5, HSP90B1                                                                                                                               |
| GOTERM_BP_FAT | GO:0006629~lipid metabolic process                               | 19    | 14.6154 | 0.002          | CYP2J2, LYPLA1, XBP1, PLA2G4F, ELOVL5, MBOAT2, MIF, ACAT2, SULT2B1, SEC14L2, INPP4B, ALDH1A3, RDH11, EHHADH, PCCB, CRYL1, DHCR7, MPDU1, SNCA                            |
| GOTERM_BP_FAT | GO:0044255~cellular lipid metabolic process                      | 16    | 12.3077 | 0.003          | CYP2J2, LYPLA1, XBP1, PLA2G4F, ELOVL5, MBOAT2, MIF, ACAT2, INPP4B, ALDH1A3, RDH11, EHHADH, PCCB, CRYL1, MPDU1, SNCA                                                     |
| GOTERM_BP_FAT | GO:0044712~single-organism catabolic process                     | 14    | 10.7692 | 0.003          | XBP1, PLA2G4F, DCXR, SORD, ACAT2, HSP90B1, GSTZ1, EHHADH, PCCB, CRYL1, DNAJB9, ADPRM, CTBS, PDE9A                                                                       |
| GOTERM_BP_FAT | GO:0035967~cellular response to topologically incorrect protein  | 6     | 4.61538 | 0.003          | XBP1, SERP1, DNAJB9, WIP1, PDIA5, HSP90B1                                                                                                                               |
| GOTERM_BP_FAT | GO:0016054~organic acid catabolic process                        | 7     | 5.38462 | 0.003          | GSTZ1, EHHADH, DCXR, PCCB, SORD, CRYL1, ACAT2                                                                                                                           |
| GOTERM_BP_FAT | GO:0030003~cellular cation homeostasis                           | 11    | 8.46154 | 0.004          | MCUR1, SCO1, CHP1, TNNI3, TRPM8, ATP6V0E2, GPR89B, SLC39A4, HSP90B1, TRPM4, SNCA                                                                                        |
| GOTERM_BP_FAT | GO:0006873~cellular ion homeostasis                              | 11    | 8.46154 | 0.005          | MCUR1, SCO1, CHP1, TNNI3, TRPM8, ATP6V0E2, GPR89B, SLC39A4, HSP90B1, TRPM4, SNCA                                                                                        |
| GOTERM_BP_FAT | GO:0006986~response to unfolded protein                          | 6     | 4.61538 | 0.005          | XBP1, SERP1, DNAJB9, WIP1, PDIA5, HSP90B1                                                                                                                               |
| GOTERM_BP_FAT | GO:0050801~ion homeostasis                                       | 12    | 9.23077 | 0.005          | MCUR1, SCO1, IFI6, CHP1, TNNI3, TRPM8, ATP6V0E2, GPR89B, SLC39A4, HSP90B1, TRPM4, SNCA                                                                                  |
| GOTERM_BP_FAT | GO:0055082~cellular chemical homeostasis                         | 12    | 9.23077 | 0.006          | XBP1, MCUR1, SCO1, CHP1, TNNI3, TRPM8, ATP6V0E2, GPR89B, SLC39A4, HSP90B1, TRPM4, SNCA                                                                                  |
| GOTERM_BP_FAT | GO:0044282~small molecule catabolic process                      | 8     | 6.15385 | 0.006          | GSTZ1, EHHADH, DCXR, PCCB, SORD, CRYL1, ADPRM, ACAT2                                                                                                                    |
| GOTERM_BP_FAT | GO:0044248~cellular catabolic process                            | 20    | 15.3846 | 0.007          | XBP1, PLA2G4F, DCXR, SORD, ISG15, ACAT2, HSP90B1, GSTZ1, HERC3, SCO1, OAS2, ANPEP, EHHADH, PCCB, CRYL1, DNAJB9, ADPRM, PDE9A, RNFI187, SNCA                             |
| GOTERM_BP_FAT | GO:0046394~carboxylic acid biosynthetic process                  | 7     | 5.38462 | 0.007          | ALDH1A3, XBP1, PLA2G4F, PSAT1, ELOVL5, PCCB, MIF                                                                                                                        |
| GOTERM_BP_FAT | GO:0072330~monocarboxylic acid biosynthetic process              | 6     | 4.61538 | 0.007          | ALDH1A3, XBP1, PLA2G4F, ELOVL5, PCCB, MIF                                                                                                                               |
| GOTERM_BP_FAT | GO:0019725~cellular homeostasis                                  | 13    | 10      | 0.007          | XBP1, MCUR1, GPR89B, PDIA5, HSP90B1, SCO1, CHP1, TNNI3, TRPM8, ATP6V0E2, SLC39A4, TRPM4, SNCA                                                                           |
| GOTERM_BP_FAT | GO:0035966~response to topologically incorrect protein           | 6     | 4.61538 | 0.007          | XBP1, SERP1, DNAJB9, WIP1, PDIA5, HSP90B1                                                                                                                               |
| GOTERM_BP_FAT | GO:0055080~cation homeostasis                                    | 11    | 8.46154 | 0.008          | MCUR1, SCO1, CHP1, TNNI3, TRPM8, ATP6V0E2, GPR89B, SLC39A4, HSP90B1, TRPM4, SNCA                                                                                        |
| GOTERM_BP_FAT | GO:0016053~organic acid biosynthetic process                     | 7     | 5.38462 | 0.009          | ALDH1A3, XBP1, PLA2G4F, PSAT1, ELOVL5, PCCB, MIF                                                                                                                        |
| GOTERM_BP_FAT | GO:0006066~alcohol metabolic process                             | 7     | 5.38462 | 0.010          | SEC14L2, INPP4B, ALDH1A3, RDH11, SORD, DHCR7, SNCA                                                                                                                      |
| GOTERM_BP_FAT | GO:0098771~inorganic ion homeostasis                             | 11    | 8.46154 | 0.010          | MCUR1, SCO1, CHP1, TNNI3, TRPM8, ATP6V0E2, GPR89B, SLC39A4, HSP90B1, TRPM4, SNCA                                                                                        |
| GOTERM_BP_FAT | GO:0055114~oxidation-reduction process                           | 14    | 10.7692 | 0.010          | CYP2J2, ABCC4, SMOX, DCXR, SORD, ACAT2, PDIA5, C15ORF48, ALDH1A3, RDH11, EHHADH, CRYL1, DHCR7, SNCA                                                                     |
| GOTERM_BP_FAT | GO:0071310~cellular response to organic substance                | 24    | 18.4615 | 0.011          | SPON2, XBP1, PAQR6, PLA2G4F, GALNT3, STAT1, IFI6, ISG15, WIP1, MIF, FGFR1L, PDIA5, GNAI1, HIPK2, HSP90B1, KRT18, SERP1, OAS2, OAS3, DNAJB9, ATP6V0E2, IRF9, TRPM4, SNCA |
| GOTERM_BP_FAT | GO:0005975~carbohydrate metabolic process                        | 12    | 9.23077 | 0.011          | SERP1, GALNT3, OAS2, DCXR, RPN1, TFF3, SORD, CHP1, CTBS, GNE, MPDU1, SNCA                                                                                               |
| GOTERM_BP_FAT | GO:0006633~fatty acid biosynthetic process                       | 5     | 3.84615 | 0.014          | XBP1, PLA2G4F, ELOVL5, PCCB, MIF                                                                                                                                        |
| GOTERM_BP_FAT | GO:0060333~interferon-gamma-mediated signaling pathway           | 4     | 3.07692 | 0.015          | STAT1, OAS2, OAS3, IRF9                                                                                                                                                 |
| GOTERM_BP_FAT | GO:0019585~glucuronate metabolic process                         | 3     | 2.30769 | 0.015          | DCXR, SORD, CRYL1                                                                                                                                                       |
| GOTERM_BP_FAT | GO:0006063~uronic acid metabolic process                         | 3     | 2.30769 | 0.015          | DCXR, SORD, CRYL1                                                                                                                                                       |
| GOTERM_BP_FAT | GO:0051607~defense response to virus                             | 6     | 4.61538 | 0.016          | SPON2, STAT1, OAS2, OAS3, ISG15, IRF9                                                                                                                                   |
| GOTERM_BP_FAT | GO:1901615~organic hydroxy compound metabolic process            | 8     | 6.15385 | 0.017          | SEC14L2, INPP4B, ALDH1A3, PSAT1, RDH11, SORD, DHCR7, SNCA                                                                                                               |
| GOTERM_BP_FAT | GO:0048878~chemical homeostasis                                  | 14    | 10.7692 | 0.017          | XBP1, MCUR1, STAT1, IFI6, GPR89B, HSP90B1, SCO1, CHP1, TNNI3, TRPM8, ATP6V0E2, SLC39A4, TRPM4, SNCA                                                                     |
| GOTERM_BP_FAT | GO:0042592~homeostatic process                                   | 19    | 14.6154 | 0.017          | XBP1, MCUR1, STAT1, IFI6, ISG15, MIF, GPR89B, PDIA5, HIPK2, HSP90B1, SCO1, CHP1, TNNI3, POTEF, TRPM8, ATP6V0E2, SLC39A4, TRPM4, SNCA                                    |
| GOTERM_BP_FAT | GO:0045087~innate immune response                                | 12    | 9.23077 | 0.018          | SPON2, RPS6KA3, STAT1, OAS2, OAS3, IFI6, RAB27A, ISG15, MIF, IRF9, HSP90B1, SNCA                                                                                        |
| GOTERM_BP_FAT | GO:0008610~lipid biosynthetic process                            | 10    | 7.69231 | 0.019          | SEC14L2, INPP4B, ALDH1A3, XBP1, PLA2G4F, ELOVL5, PCCB, MBOAT2, DHCR7, MIF                                                                                               |
| GOTERM_BP_FAT | GO:1902930~regulation of alcohol biosynthetic process            | 3     | 2.30769 | 0.020          | SEC14L2, DHCR7, SNCA                                                                                                                                                    |
| GOTERM_BP_FAT | GO:0034341~response to interferon-gamma                          | 5     | 3.84615 | 0.020          | STAT1, OAS2, OAS3, IRF9, SNCA                                                                                                                                           |
| GOTERM_BP_FAT | GO:1901137~carbohydrate derivative biosynthetic process          | 11    | 8.46154 | 0.024          | SERP1, GALNT3, OAS2, RFK, DCXR, RPN1, SORD, CRYL1, CHP1, GNE, MPDU1                                                                                                     |
| GOTERM_BP_FAT | GO:0044723~single-organism carbohydrate metabolic process        | 10    | 7.69231 | 0.025          | SERP1, GALNT3, OAS2, DCXR, RPN1, SORD, CHP1, CTBS, MPDU1, SNCA                                                                                                          |

|               |                                                                              |    |         |       |                                                                                                                                                                                                     |
|---------------|------------------------------------------------------------------------------|----|---------|-------|-----------------------------------------------------------------------------------------------------------------------------------------------------------------------------------------------------|
| GOTERM_BP_FAT | GO:0070887~cellular response to chemical stimulus                            | 26 | 20      | 0.028 | <i>SPON2, IFI6, FGFR1, GNAI1, HSP90B1, SERP1, DNAJB9, ATP6V0E2, TRPM4, SNCA, CYP2J2, XBP1, PAQR6, PLA2G4F, GALNT3, STAT1, WIP1, ISG15, MIF, PDIA5, HIPK2, KRT18, OAS2, OAS3, SAA2, IRF9</i>         |
| GOTERM_BP_FAT | GO:1901135~carbohydrate derivative metabolic process                         | 15 | 11.5385 | 0.029 | <i>GALNT3, DCXR, RPN1, SORD, SULT2B1, SERP1, OAS2, RFK, CRYL1, CHP1, CTBS, PDE9A, GNE, MPDU1, SNCA</i>                                                                                              |
| GOTERM_BP_FAT | GO:0034976~response to endoplasmic reticulum stress                          | 6  | 4.61538 | 0.030 | <i>XBP1, SERP1, DNAJB9, WIP1, PDIA5, HSP90B1</i>                                                                                                                                                    |
| GOTERM_BP_FAT | GO:0090407~organophosphate biosynthetic process                              | 9  | 6.92308 | 0.031 | <i>INPP4B, XBP1, OAS2, RFK, DCXR, SORD, MBOAT2, CRYL1, SNCA</i>                                                                                                                                     |
| GOTERM_BP_FAT | GO:0002700~regulation of production of molecular mediator of immune response | 4  | 3.07692 | 0.032 | <i>SPON2, XBP1, MIF, TRPM4</i>                                                                                                                                                                      |
| GOTERM_BP_FAT | GO:0032309~icosanoid secretion                                               | 3  | 2.30769 | 0.032 | <i>ABCC4, PLA2G4F, MIF</i>                                                                                                                                                                          |
| GOTERM_BP_FAT | GO:0010033~response to organic substance                                     | 27 | 20.7692 | 0.033 | <i>SPON2, IFI6, FGFR1, GNAI1, HSP90B1, RPS6KA3, SERP1, DNAJB9, ATP6V0E2, TRPM4, SNCA, ABCC4, XBP1, PAQR6, PLA2G4F, GALNT3, STAT1, SORD, WIP1, ISG15, MIF, PDIA5, HIPK2, KRT18, OAS2, OAS3, IRF9</i> |
| GOTERM_BP_FAT | GO:0033559~unsaturated fatty acid metabolic process                          | 4  | 3.07692 | 0.038 | <i>CYP2J2, PLA2G4F, ELOVL5, MIF</i>                                                                                                                                                                 |
| GOTERM_BP_FAT | GO:0071715~icosanoid transport                                               | 3  | 2.30769 | 0.038 | <i>ABCC4, PLA2G4F, MIF</i>                                                                                                                                                                          |
| GOTERM_BP_FAT | GO:0006875~cellular metal ion homeostasis                                    | 8  | 6.15385 | 0.039 | <i>MCUR1, SLC39A4, SLC39A4, HSP90B1, TRPM4, SNCA</i>                                                                                                                                                |
| GOTERM_BP_FAT | GO:0009605~response to external stimulus                                     | 21 | 16.1538 | 0.040 | <i>SPON2, CNTNAP2, XBP1, STAT1, PLEKH81, SORD, ISG15, MIF, TTN, RPS6KA3, ALDH1A3, RELN, RDH11, OAS2, OAS3, SAA2, TRPM8, IRF9, SLC39A4, TRPM4, SNCA</i>                                              |
| GOTERM_BP_FAT | GO:0009581~detection of external stimulus                                    | 4  | 3.07692 | 0.040 | <i>RDH11, PLEKH81, TRPM8, TTN</i>                                                                                                                                                                   |
| GOTERM_BP_FAT | GO:0009582~detection of abiotic stimulus                                     | 4  | 3.07692 | 0.043 | <i>RDH11, PLEKH81, TRPM8, TTN</i>                                                                                                                                                                   |
| GOTERM_BP_FAT | GO:0008215~spermine metabolic process                                        | 2  | 1.53846 | 0.044 | <i>SMOX, SMS</i>                                                                                                                                                                                    |
| GOTERM_BP_FAT | GO:0002252~immune effector process                                           | 10 | 7.69231 | 0.049 | <i>SPON2, XBP1, STAT1, OAS2, OAS3, RAB27A, ISG15, MIF, IRF9, TRPM4</i>                                                                                                                              |
