# Supplementary material for: Prognostic Impact of Sarcopenia in Patients with Metastatic Hormone-Sensitive Prostate Cancer
Source: MDPI journal article supplement (doi:10.3390/cancers13246345), 2021-12-17
Supplement: s1 [file s1]

Table S1. Gene ontology using up-regulated genes in sarcopenia (cutoff: *P* value <0.05)

| Category      | Term                                                                                              | Count | %        | P value | Genes                                                                                                                                                                                                                                                                              |
|---------------|---------------------------------------------------------------------------------------------------|-------|----------|---------|------------------------------------------------------------------------------------------------------------------------------------------------------------------------------------------------------------------------------------------------------------------------------------|
| GOTERM_BP_FAT | GO:0002011~morphogenesis of an epithelial sheet                                                   | 5     | 2.702703 | 0.001   | <i>VANGL2, FLRT3, AJUBA, BMP7, CYR61</i>                                                                                                                                                                                                                                           |
| GOTERM_BP_FAT | GO:0030198~extracellular matrix organization                                                      | 11    | 5.945946 | 0.001   | <i>HPSE2, ELF3, ITGA3, ITGA2, COL4A6, COL4A5, COL9A3, LAMC2, ITGB6, THSD4, CYR61</i>                                                                                                                                                                                               |
| GOTERM_BP_FAT | GO:0043062~extracellular structure organization                                                   | 11    | 5.945946 | 0.002   | <i>HPSE2, ELF3, ITGA3, ITGA2, COL4A6, COL4A5, COL9A3, LAMC2, ITGB6, THSD4, CYR61</i>                                                                                                                                                                                               |
| GOTERM_BP_FAT | GO:0007167~enzyme linked receptor protein signaling pathway                                       | 20    | 10.81081 | 0.002   | <i>KL, IRS1, CAV2, ITGA3, HFE, ARHGEF28, NRG1, BMP7, PRLR, DKK1, CYR61, DNM1, FLRT3, CHN1, COL4A5, SPRY1, ROR1, ATP6V0A4, RNF165, ATP6V1C2</i>                                                                                                                                     |
| GOTERM_BP_FAT | GO:0007409~axonogenesis                                                                           | 12    | 6.486486 | 0.002   | <i>LRFN5, VANGL2, BCL11A, FLRT3, CHN1, NRXN3, SLITRK6, NTN4, NRG1, BMP7, RNF165, ROBO1</i>                                                                                                                                                                                         |
| GOTERM_BP_FAT | GO:0006805~xenobiotic metabolic process                                                           | 6     | 3.243243 | 0.003   | <i>GSTM2, GSTM1, FMO2, CYP3A5, UGT1A6, CES1</i>                                                                                                                                                                                                                                    |
| GOTERM_BP_FAT | GO:0048667~cell morphogenesis involved in neuron differentiation                                  | 13    | 7.027027 | 0.003   | <i>BCL11A, NTN4, NRXN3, NRG1, BMP7, ROBO1, LRFN5, VANGL2, FLRT3, ID2, CHN1, SLITRK6, RNF165</i>                                                                                                                                                                                    |
| GOTERM_BP_FAT | GO:0070886~positive regulation of calcineurin-NFAT signaling cascade                              | 3     | 1.621622 | 0.003   | <i>AKAP6, NRG1, LMCD1</i>                                                                                                                                                                                                                                                          |
| GOTERM_BP_FAT | GO:0071466~cellular response to xenobiotic stimulus                                               | 6     | 3.243243 | 0.003   | <i>GSTM2, GSTM1, FMO2, CYP3A5, UGT1A6, CES1</i>                                                                                                                                                                                                                                    |
| GOTERM_BP_FAT | GO:0046578~regulation of Ras protein signal transduction                                          | 8     | 4.324324 | 0.004   | <i>RASA4B, ITGA3, RASA4, ARHGEF28, ARHGEF4, SPRY1, NRG1, ROBO1</i>                                                                                                                                                                                                                 |
| GOTERM_BP_FAT | GO:0007265~Ras protein signal transduction                                                        | 10    | 5.405405 | 0.004   | <i>VANGL2, RASA4B, ITGA3, RASA4, PLK2, ARHGEF28, ARHGEF4, SPRY1, NRG1, ROBO1</i>                                                                                                                                                                                                   |
| GOTERM_BP_FAT | GO:0061564~axon development                                                                       | 12    | 6.486486 | 0.004   | <i>LRFN5, VANGL2, BCL11A, FLRT3, CHN1, NRXN3, SLITRK6, NTN4, NRG1, BMP7, RNF165, ROBO1</i>                                                                                                                                                                                         |
| GOTERM_BP_FAT | GO:0009410~response to xenobiotic stimulus                                                        | 6     | 3.243243 | 0.004   | <i>GSTM2, GSTM1, FMO2, CYP3A5, UGT1A6, CES1</i>                                                                                                                                                                                                                                    |
| GOTERM_BP_FAT | GO:0017144~drug metabolic process                                                                 | 4     | 2.162162 | 0.005   | <i>CYP4B1, FMO2, CYP4F12, CYP3A5</i>                                                                                                                                                                                                                                               |
| GOTERM_BP_FAT | GO:0007264~small GTPase mediated signal transduction                                              | 13    | 7.027027 | 0.005   | <i>ARL10, RASA4B, ITGA3, PLK2, ARHGEF28, NRG1, RND3, ROBO1, VANGL2, RASA4, ARHGEF4, RAB38, SPRY1</i>                                                                                                                                                                               |
| GOTERM_BP_FAT | GO:0031581~hemidesmosome assembly                                                                 | 3     | 1.621622 | 0.006   | <i>DST, LAMC2, KRT5</i>                                                                                                                                                                                                                                                            |
| GOTERM_BP_FAT | GO:0007411~axon guidance                                                                          | 8     | 4.324324 | 0.006   | <i>VANGL2, FLRT3, CHN1, NRXN3, NTN4, BMP7, RNF165, ROBO1</i>                                                                                                                                                                                                                       |
| GOTERM_BP_FAT | GO:0097485~neuron projection guidance                                                             | 8     | 4.324324 | 0.006   | <i>VANGL2, FLRT3, CHN1, NRXN3, NTN4, BMP7, RNF165, ROBO1</i>                                                                                                                                                                                                                       |
| GOTERM_BP_FAT | GO:0007369~gastrulation                                                                           | 7     | 3.783784 | 0.006   | <i>OSR2, VANGL2, DUSP1, ITGA3, ITGA2, BMP7, DKK1</i>                                                                                                                                                                                                                               |
| GOTERM_BP_FAT | GO:0060429~epithelium development                                                                 | 20    | 10.81081 | 0.006   | <i>KRT4, ITGA2, NTN4, NRG1, BMP7, PRLR, DKK1, CYR61, ROBO1, VANGL2, ELF3, FLRT3, KRT16, ID2, SLITRK6, SPRY1, ROR1, AJUBA, CES1, KRT6A</i>                                                                                                                                          |
| GOTERM_BP_FAT | GO:0050850~positive regulation of calcium-mediated signaling                                      | 4     | 2.162162 | 0.007   | <i>GSTM2, AKAP6, NRG1, LMCD1</i>                                                                                                                                                                                                                                                   |
| GOTERM_BP_FAT | GO:0050808~synapse organization                                                                   | 8     | 4.324324 | 0.007   | <i>NLGN4Y, CACNB2, FLRT3, NRXN3, SLITRK6, COL4A5, NRG1, DKK1</i>                                                                                                                                                                                                                   |
| GOTERM_BP_FAT | GO:0048729~tissue morphogenesis                                                                   | 14    | 7.567568 | 0.007   | <i>ITGA3, ITGA2, NTN4, NRG1, BMP7, DKK1, CYR61, VANGL2, FLRT3, KRT16, SPRY1, ROR1, AJUBA, KRT6A</i>                                                                                                                                                                                |
| GOTERM_BP_FAT | GO:0046580~negative regulation of Ras protein signal transduction                                 | 4     | 2.162162 | 0.007   | <i>RASA4B, ITGA3, RASA4, SPRY1</i>                                                                                                                                                                                                                                                 |
| GOTERM_BP_FAT | GO:0042330~taxis                                                                                  | 13    | 7.027027 | 0.007   | <i>ITGA2, NTN4, NRXN3, NRG1, BMP7, CYR61, ROBO1, VANGL2, FLRT3, ID2, CHN1, S100A14, RNF165</i>                                                                                                                                                                                     |
| GOTERM_BP_FAT | GO:0051058~negative regulation of small GTPase mediated signal transduction                       | 4     | 2.162162 | 0.008   | <i>RASA4B, ITGA3, RASA4, SPRY1</i>                                                                                                                                                                                                                                                 |
| GOTERM_BP_FAT | GO:0051056~regulation of small GTPase mediated signal transduction                                | 9     | 4.864865 | 0.008   | <i>RASA4B, ITGA3, RASA4, ARHGEF28, CHN1, ARHGEF4, SPRY1, NRG1, ROBO1</i>                                                                                                                                                                                                           |
| GOTERM_BP_FAT | GO:0008544~epidermis development                                                                  | 9     | 4.864865 | 0.009   | <i>VANGL2, ELF3, KRT16, SLITRK6, LAMC2, KRT5, DKK1, EDA2R, ZNF750</i>                                                                                                                                                                                                              |
| GOTERM_BP_FAT | GO:0030879~mammary gland development                                                              | 6     | 3.243243 | 0.009   | <i>ELF3, ID2, ITGA2, NRG1, PRLR, ROBO1</i>                                                                                                                                                                                                                                         |
| GOTERM_BP_FAT | GO:0048598~embryonic morphogenesis                                                                | 13    | 7.027027 | 0.009   | <i>OSR2, DUSP1, ITGA3, ITGA2, FOXI1, BMP7, DKK1, CYR61, VANGL2, FLRT3, ID2, SLITRK6, SP8</i>                                                                                                                                                                                       |
| GOTERM_BP_FAT | GO:0007169~transmembrane receptor protein tyrosine kinase signaling pathway                       | 14    | 7.567568 | 0.010   | <i>KL, IRS1, CAV2, ARHGEF28, NRG1, PRLR, DNM1, FLRT3, CHN1, COL4A5, SPRY1, ROR1, ATP6V0A4, ATP6V1C2</i>                                                                                                                                                                            |
| GOTERM_BP_FAT | GO:0071495~cellular response to endogenous stimulus                                               | 21    | 11.35135 | 0.010   | <i>KL, GSTM2, DUSP1, IRS1, CAV2, ITGA3, HFE, LMO3, AKAP6, ROR8, BMP7, PRLR, DKK1, CYR61, CPEB1, FLRT3, COL4A6, SPRY1, ATP6V0A4, RNF165, ATP6V1C2</i>                                                                                                                               |
| GOTERM_BP_FAT | GO:0007044~cell-substrate junction assembly                                                       | 5     | 2.702703 | 0.010   | <i>DST, ITGA2, LAMC2, KRT5, AJUBA</i>                                                                                                                                                                                                                                              |
| GOTERM_BP_FAT | GO:0009790~embryo development                                                                     | 18    | 9.72973  | 0.010   | <i>OSR2, DUSP1, ITGA3, NRK, ITGA2, FOXI1, NRG1, BMP7, DKK1, CYR61, STOX2, KRT19, VANGL2, ELF3, FLRT3, ID2, SLITRK6, SP8</i>                                                                                                                                                        |
| GOTERM_BP_FAT | GO:0070887~cellular response to chemical stimulus                                                 | 38    | 20.54054 | 0.011   | <i>IRS1, HFE, AKAP6, ROR8, CYP3A5, CYR61, EDA2R, ROBO1, DUOX1, FLRT3, ATP6V0A4, S100A14, PRODH, ATP6V1C2, UGT1A6, KL, GSTM2, GSTM1, CAV2, ITGA3, DUSP1, LMO3, ITGA2, KRT13, TNFRSF10C, FMO2, BMP7, DKK1, PRLR, IL17RB, CPEB1, CYP24A1, RASA4, ID2, COL4A6, SPRY1, RNF165, CES1</i> |
| GOTERM_BP_FAT | GO:0070884~regulation of calcineurin-NFAT signaling cascade                                       | 3     | 1.621622 | 0.011   | <i>AKAP6, NRG1, LMCD1</i>                                                                                                                                                                                                                                                          |
| GOTERM_BP_FAT | GO:0051962~positive regulation of nervous system development                                      | 11    | 5.945946 | 0.012   | <i>BCL11A, FLRT3, ITGA3, ID2, DUOX1, NRXN3, SLITRK6, NRG1, BMP7, DKK1, ROBO1</i>                                                                                                                                                                                                   |
| GOTERM_BP_FAT | GO:1902532~negative regulation of intracellular signal transduction                               | 11    | 5.945946 | 0.012   | <i>GSTM2, RASA4B, DUSP1, FLRT3, ITGA3, RASA4, LMO3, WWC2, SPRY1, AJUBA, BMP7</i>                                                                                                                                                                                                   |
| GOTERM_BP_FAT | GO:1902531~regulation of intracellular signal transduction                                        | 27    | 14.59459 | 0.013   | <i>IRS1, ARHGEF28, NRK, WWC2, AKAP6, CYR61, EDA2R, ROBO1, FLRT3, CHN1, LMCD1, KL, GSTM2, RASA4B, CAV2, ITGA3, DUSP1, LMO3, PLK2, NRG1, BMP7, PRLR, VANGL2, RASA4, ARHGEF4, SPRY1, AJUBA</i>                                                                                        |
| GOTERM_BP_FAT | GO:0042537~benzene-containing compound metabolic process                                          | 3     | 1.621622 | 0.016   | <i>GSTM2, GSTM1, CYP4B1</i>                                                                                                                                                                                                                                                        |
| GOTERM_BP_FAT | GO:0048812~neuron projection morphogenesis                                                        | 12    | 6.486486 | 0.016   | <i>LRFN5, VANGL2, BCL11A, FLRT3, CHN1, NRXN3, SLITRK6, NTN4, NRG1, BMP7, RNF165, ROBO1</i>                                                                                                                                                                                         |
| GOTERM_BP_FAT | GO:0051960~regulation of nervous system development                                               | 15    | 8.108108 | 0.016   | <i>BCL11A, ITGA3, PLK2, DIXDC1, NRXN3, NRG1, BMP7, DKK1, ROBO1, VANGL2, FLRT3, ID2, DUOX1, CHN1, SLITRK6</i>                                                                                                                                                                       |
| GOTERM_BP_FAT | GO:0090092~regulation of transmembrane receptor protein serine/threonine kinase signaling pathway | 7     | 3.783784 | 0.017   | <i>CAV2, ITGA3, HFE, BMP7, DKK1, CYR61, RNF165</i>                                                                                                                                                                                                                                 |
| GOTERM_BP_FAT | GO:0033173~calcineurin-NFAT signaling cascade                                                     | 3     | 1.621622 | 0.017   | <i>AKAP6, NRG1, LMCD1</i>                                                                                                                                                                                                                                                          |
| GOTERM_BP_FAT | GO:0009968~negative regulation of signal transduction                                             | 19    | 10.27027 | 0.017   | <i>GSTM2, RASA4B, DUSP1, IRS1, CAV2, ITGA3, LMO3, WWC2, DDIT4L, NRG1, KIF7, BMP7, DKK1, DNM1, ROBO1, RASA4, FLRT3, SPRY1, AJUBA</i>                                                                                                                                                |
| GOTERM_BP_FAT | GO:0006935~chemotaxis                                                                             | 12    | 6.486486 | 0.018   | <i>VANGL2, FLRT3, ITGA2, CHN1, NRXN3, NTN4, NRG1, S100A14, BMP7, CYR61, RNF165, ROBO1</i>                                                                                                                                                                                          |
| GOTERM_BP_FAT | GO:0009967~positive regulation of signal transduction                                             | 23    | 12.43243 | 0.018   | <i>KL, GSTM2, IRS1, CAV2, HFE, LMO3, PLK2, NRK, DIXDC1, AKAP6, NRG1, KIF7, BMP7, PRLR, CYR61, EDA2R, ROBO1, VANGL2, CHN1, AJUBA, LMCD1, RNF165, ATP6V1C2</i>                                                                                                                       |
| GOTERM_BP_FAT | GO:1901687~glutathione derivative biosynthetic process                                            | 3     | 1.621622 | 0.019   | <i>GSTM2, GSTM1, GSTM5</i>                                                                                                                                                                                                                                                         |
| GOTERM_BP_FAT | GO:1901685~glutathione derivative metabolic process                                               | 3     | 1.621622 | 0.019   | <i>GSTM2, GSTM1, GSTM5</i>                                                                                                                                                                                                                                                         |
| GOTERM_BP_FAT | GO:0010648~negative regulation of cell communication                                              | 20    | 10.81081 | 0.019   | <i>GSTM2, RASA4B, DUSP1, IRS1, CAV2, ITGA3, LMO3, PLK2, WWC2, DDIT4L, NRG1, KIF7, BMP7, DKK1, DNM1, ROBO1, RASA4, FLRT3, SPRY1, AJUBA</i>                                                                                                                                          |

|               |                                                                                  |    |          |       |                                                                                                                                                                                                                                                            |
|---------------|----------------------------------------------------------------------------------|----|----------|-------|------------------------------------------------------------------------------------------------------------------------------------------------------------------------------------------------------------------------------------------------------------|
| GOTERM_BP_FAT | GO:0023057~negative regulation of signaling                                      | 20 | 10.81081 | 0.019 | <i>GSTM2, RASA4B, DUSP1, IRS1, CAV2, ITGA3, LMO3, PLK2, WWC2, DDIT4L, NRG1, KIF7, BMP7, DKK1, DNM1, ROBO1, RASA4, FLRT3, SPRY1, AJUBA</i>                                                                                                                  |
| GOTERM_BP_FAT | GO:0010243~response to organonitrogen compound                                   | 15 | 8.108108 | 0.020 | <i>KL, GSTM2, DUSP1, IRS1, CAV2, ITGA2, AKAP6, BMP7, PRLR, DUOX1, CPEB1, PPP1R1B, COL4A6, ATP6V0A4, ATP6V1C2</i>                                                                                                                                           |
| GOTERM_BP_FAT | GO:0060411~cardiac septum morphogenesis                                          | 4  | 2.162162 | 0.023 | <i>VANGL2, ID2, BMP7, CYR61</i>                                                                                                                                                                                                                            |
| GOTERM_BP_FAT | GO:0009719~response to endogenous stimulus                                       | 24 | 12.97297 | 0.023 | <i>KL, GSTM2, DUSP1, IRS1, CAV2, ITGA3, HFE, LMO3, ITGA2, AKAP6, ROXB, BMP7, PRLR, DKK1, CYR61, DUOX1, CPEB1, FLRT3, PPP1R1B, COL4A6, SPRY1, ATP6V0A4, RNF165, ATP6V1C2</i>                                                                                |
| GOTERM_BP_FAT | GO:0008286~insulin receptor signaling pathway                                    | 5  | 2.702703 | 0.024 | <i>KL, IRS1, CAV2, ATP6V0A4, ATP6V1C2</i>                                                                                                                                                                                                                  |
| GOTERM_BP_FAT | GO:0010647~positive regulation of cell communication                             | 24 | 12.97297 | 0.025 | <i>KL, GSTM2, IRS1, CAV2, HFE, LMO3, PLK2, NRK, ITGA2, DIXDC1, AKAP6, NRG1, KIF7, BMP7, PRLR, CYR61, EDA2R, ROBO1, VANGL2, CHN1, AJUBA, LMCD1, RNF165, ATP6V1C2</i>                                                                                        |
| GOTERM_BP_FAT | GO:1901698~response to nitrogen compound                                         | 16 | 8.648649 | 0.026 | <i>KL, GSTM2, GSTM1, DUSP1, IRS1, CAV2, ITGA2, AKAP6, BMP7, PRLR, DUOX1, CPEB1, PPP1R1B, COL4A6, ATP6V0A4, ATP6V1C2</i>                                                                                                                                    |
| GOTERM_BP_FAT | GO:2000725~regulation of cardiac muscle cell differentiation                     | 3  | 1.621622 | 0.026 | <i>AKAP6, NRG1, DKK1</i>                                                                                                                                                                                                                                   |
| GOTERM_BP_FAT | GO:0023056~positive regulation of signaling                                      | 24 | 12.97297 | 0.026 | <i>KL, GSTM2, IRS1, CAV2, HFE, LMO3, PLK2, NRK, ITGA2, DIXDC1, AKAP6, NRG1, KIF7, BMP7, PRLR, CYR61, EDA2R, ROBO1, VANGL2, CHN1, AJUBA, LMCD1, RNF165, ATP6V1C2</i>                                                                                        |
| GOTERM_BP_FAT | GO:0007507~heart development                                                     | 11 | 5.945946 | 0.026 | <i>FHOD3, VANGL2, FLRT3, ITGA3, ID2, AKAP6, NRG1, BMP7, DKK1, CYR61, ROBO1</i>                                                                                                                                                                             |
| GOTERM_BP_FAT | GO:0001704~formation of primary germ layer                                       | 5  | 2.702703 | 0.027 | <i>DUSP1, ITGA3, ITGA2, BMP7, DKK1</i>                                                                                                                                                                                                                     |
| GOTERM_BP_FAT | GO:0003206~cardiac chamber morphogenesis                                         | 5  | 2.702703 | 0.027 | <i>VANGL2, ID2, NRG1, BMP7, CYR61</i>                                                                                                                                                                                                                      |
| GOTERM_BP_FAT | GO:0045995~regulation of embryonic development                                   | 5  | 2.702703 | 0.027 | <i>OSR2, VANGL2, NRK, BMP7, DKK1</i>                                                                                                                                                                                                                       |
| GOTERM_BP_FAT | GO:0090383~phagosome acidification                                               | 3  | 1.621622 | 0.028 | <i>RAB38, ATP6V0A4, ATP6V1C2</i>                                                                                                                                                                                                                           |
| GOTERM_BP_FAT | GO:0070458~cellular detoxification of nitrogen compound                          | 2  | 1.081081 | 0.029 | <i>GSTM2, GSTM1</i>                                                                                                                                                                                                                                        |
| GOTERM_BP_FAT | GO:0001707~mesoderm formation                                                    | 4  | 2.162162 | 0.029 | <i>ITGA3, ITGA2, BMP7, DKK1</i>                                                                                                                                                                                                                            |
| GOTERM_BP_FAT | GO:0000904~cell morphogenesis involved in differentiation                        | 14 | 7.567568 | 0.030 | <i>BCL11A, NTN4, NRXN3, NRG1, BMP7, DKK1, ROBO1, LRFN5, VANGL2, FLRT3, ID2, CHN1, SLITRK6, RNF165</i>                                                                                                                                                      |
| GOTERM_BP_FAT | GO:0048332~mesoderm morphogenesis                                                | 4  | 2.162162 | 0.031 | <i>ITGA3, ITGA2, BMP7, DKK1</i>                                                                                                                                                                                                                            |
| GOTERM_BP_FAT | GO:0030278~regulation of ossification                                            | 6  | 3.243243 | 0.031 | <i>KL, OSR2, ID2, ROXB, BMP7, CYR61</i>                                                                                                                                                                                                                    |
| GOTERM_BP_FAT | GO:0048738~cardiac muscle tissue development                                     | 6  | 3.243243 | 0.034 | <i>FHOD3, ID2, AKAP6, NRG1, BMP7, DKK1</i>                                                                                                                                                                                                                 |
| GOTERM_BP_FAT | GO:0090596~sensory organ morphogenesis                                           | 7  | 3.783784 | 0.034 | <i>OSR2, VANGL2, KRT13, FOXI1, SLITRK6, ROXB, BMP7</i>                                                                                                                                                                                                     |
| GOTERM_BP_FAT | GO:0032869~cellular response to insulin stimulus                                 | 6  | 3.243243 | 0.035 | <i>KL, CPEB1, IRS1, CAV2, ATP6V0A4, ATP6V1C2</i>                                                                                                                                                                                                           |
| GOTERM_BP_FAT | GO:1901021~positive regulation of calcium ion transmembrane transporter activity | 3  | 1.621622 | 0.036 | <i>CACNB2, GSTM2, AKAP6</i>                                                                                                                                                                                                                                |
| GOTERM_BP_FAT | GO:0050890~cognition                                                             | 7  | 3.783784 | 0.036 | <i>NLGN4Y, ITGA3, PLK2, PPP1R1B, NRXN3, TMPPSS11E, DKK1</i>                                                                                                                                                                                                |
| GOTERM_BP_FAT | GO:0007416~synapse assembly                                                      | 5  | 2.702703 | 0.037 | <i>NLGN4Y, FLRT3, NRXN3, SLITRK6, NRG1</i>                                                                                                                                                                                                                 |
| GOTERM_BP_FAT | GO:0044708~single-organism behavior                                              | 9  | 4.864865 | 0.037 | <i>NLGN4Y, ITGA3, PLK2, ID2, PPP1R1B, NRXN3, SLITRK6, DKK1, DNM1</i>                                                                                                                                                                                       |
| GOTERM_BP_FAT | GO:0048333~mesodermal cell differentiation                                       | 3  | 1.621622 | 0.038 | <i>ITGA3, ITGA2, DKK1</i>                                                                                                                                                                                                                                  |
| GOTERM_BP_FAT | GO:0048016~inositol phosphate-mediated signaling                                 | 3  | 1.621622 | 0.038 | <i>AKAP6, NRG1, LMCD1</i>                                                                                                                                                                                                                                  |
| GOTERM_BP_FAT | GO:0018916~nitrobenzene metabolic process                                        | 2  | 1.081081 | 0.038 | <i>GSTM2, GSTM1</i>                                                                                                                                                                                                                                        |
| GOTERM_BP_FAT | GO:1900138~negative regulation of phospholipase A2 activity                      | 2  | 1.081081 | 0.038 | <i>ANXA8L1, ANXA8</i>                                                                                                                                                                                                                                      |
| GOTERM_BP_FAT | GO:0050848~regulation of calcium-mediated signaling                              | 4  | 2.162162 | 0.039 | <i>GSTM2, AKAP6, NRG1, LMCD1</i>                                                                                                                                                                                                                           |
| GOTERM_BP_FAT | GO:0050877~neurological system process                                           | 20 | 10.81081 | 0.040 | <i>BCL11A, PRRT2, PDE1C, ITGA3, PLK2, ITGA2, NRXN3, OR5P3, NRG1, OR5P2, ROXB, TMPPSS11E, DKK1, DNM1, SCNN1G, CACNB2, PPP1R1B, SLITRK6, ATP6V0A4, TRPM3</i>                                                                                                 |
| GOTERM_BP_FAT | GO:0071417~cellular response to organonitrogen compound                          | 10 | 5.405405 | 0.041 | <i>KL, GSTM2, CPEB1, IRS1, CAV2, COL4A6, AKAP6, ATP6V0A4, PRLR, ATP6V1C2</i>                                                                                                                                                                               |
| GOTERM_BP_FAT | GO:0003156~regulation of organ formation                                         | 3  | 1.621622 | 0.042 | <i>SPRY1, BMP7, DKK1</i>                                                                                                                                                                                                                                   |
| GOTERM_BP_FAT | GO:0044255~cellular lipid metabolic process                                      | 17 | 9.189189 | 0.043 | <i>KL, GSTM2, ST6GALNAC2, INPP1, IRS1, ACOT11, NRG1, CYP3A5, CYP4F12, CYR61, ACSF2, ST3GAL5, SPTSSB, BCO2, AJUBA, CES1, UGT1A6</i>                                                                                                                         |
| GOTERM_BP_FAT | GO:0030509~BMP signaling pathway                                                 | 5  | 2.702703 | 0.043 | <i>HFE, BMP7, DKK1, CYR61, RNF165</i>                                                                                                                                                                                                                      |
| GOTERM_BP_FAT | GO:0045664~regulation of neuron differentiation                                  | 11 | 5.945946 | 0.044 | <i>BCL11A, ITGA3, PLK2, ID2, DUOX1A1, CHN1, DIXDC1, NRG1, BMP7, DKK1, ROBO1</i>                                                                                                                                                                            |
| GOTERM_BP_FAT | GO:0030510~regulation of BMP signaling pathway                                   | 4  | 2.162162 | 0.044 | <i>ITGA3, DKK1, CYR61, RNF165</i>                                                                                                                                                                                                                          |
| GOTERM_BP_FAT | GO:0048666~neuron development                                                    | 16 | 8.648649 | 0.045 | <i>BCL11A, ITGA3, PLK2, NTN4, NRXN3, NRG1, ROXB, BMP7, ROBO1, LRFN5, VANGL2, FLRT3, ID2, CHN1, SLITRK6, RNF165</i>                                                                                                                                         |
| GOTERM_BP_FAT | GO:1905207~regulation of cardiocyte differentiation                              | 3  | 1.621622 | 0.047 | <i>AKAP6, NRG1, DKK1</i>                                                                                                                                                                                                                                   |
| GOTERM_BP_FAT | GO:0051410~detoxification of nitrogen compound                                   | 2  | 1.081081 | 0.047 | <i>GSTM2, GSTM1</i>                                                                                                                                                                                                                                        |
| GOTERM_BP_FAT | GO:0044272~sulfur compound biosynthetic process                                  | 6  | 3.243243 | 0.047 | <i>GSTM2, GSTM1, VANGL2, ACOT11, ACSF2, GSTM5</i>                                                                                                                                                                                                          |
| GOTERM_BP_FAT | GO:0030182~neuron differentiation                                                | 19 | 10.27027 | 0.047 | <i>BCL11A, ITGA3, PLK2, NTN4, DIXDC1, NRXN3, NRG1, ROXB, BMP7, DKK1, ROBO1, LRFN5, VANGL2, FLRT3, ID2, DUOX1A1, CHN1, SLITRK6, RNF165</i>                                                                                                                  |
| GOTERM_BP_FAT | GO:0007166~cell surface receptor signaling pathway                               | 35 | 18.91892 | 0.048 | <i>IRS1, HFE, ARHGEF28, DIXDC1, CYR61, EDA2R, ROBO1, DUOX1, FLRT3, CHN1, ATP6V0A4, ITGB6, GRIA3, TRPM3, ATP6V1C2, EVC2, KL, DST, CAV2, ITGA3, ITGA2, TNFRSF10C, NRG1, KIF7, BMP7, DKK1, PRLR, DNM1, IL17RB, KRT19, VANGL2, COL4A5, SPRY1, ROR1, RNF165</i> |
| GOTERM_BP_FAT | GO:0048568~embryonic organ development                                           | 9  | 4.864865 | 0.048 | <i>OSR2, KRT19, VANGL2, NRK, ID2, FOXI1, SLITRK6, BMP7, CYR61</i>                                                                                                                                                                                          |
| GOTERM_BP_FAT | GO:0045778~positive regulation of ossification                                   | 4  | 2.162162 | 0.049 | <i>KL, OSR2, BMP7, CYR61</i>                                                                                                                                                                                                                               |
| GOTERM_BP_FAT | GO:0030501~positive regulation of bone mineralization                            | 3  | 1.621622 | 0.049 | <i>KL, OSR2, BMP7</i>                                                                                                                                                                                                                                      |
| GOTERM_BP_FAT | GO:0055067~monovalent inorganic cation homeostasis                               | 5  | 2.702703 | 0.049 | <i>SCNN1G, RAB38, ATP6V0A4, CYP4F12, ATP6V1C2</i>                                                                                                                                                                                                          |
| GOTERM_BP_FAT | GO:0048584~positive regulation of response to stimulus                           | 28 | 15.13514 | 0.049 | <i>IRS1, HFE, NRK, DIXDC1, AKAP6, CYR61, EDA2R, ROBO1, CHN1, S100A14, LMCD1, ATP6V1C2, KL, GSTM2, SCARA3, CAV2, LMO3, PLK2, ITGA2, NRG1, KIF7, BMP7, PRLR, IL17RB, VANGL2, POLR3G, AJUBA, RNF165</i>                                                       |
